# Supplementary material
Source: ML conference proceedings conference paper supplement (https://openreview.net/forum?id=5o9JJJPPm6)
Supplement: supplementary_material [file attachment]

```
In [277... import os
import math
import pickle
import numpy as np
import pandas as pd
from tqdm import tqdm
import plotly.io as pio
import plotly.express as px
import plotly.graph_objects as go
from collections import defaultdict
from plotly.subplots import make_subplots
from concurrent.futures import ProcessPoolExecutor as Pool
from tensorboard.backend.event_processing.event_accumulator import EventAccumulator
pio.kaleido.scope.mathjax = None
pd.options.display.max_rows = None
```

```
In [277... LOGDIR = "logs"
ALGOS = ["bc", "bcq", "cql", "icq", "omar", "omiga", "madice", "madice-twolayer"]
# ALGOS = ["madice"]
SEEDS = [0, 1, 2, 3, 4]
SMACV1_ENV_NAMES = ["2c_vs_64zg", "5m_vs_6m", "6h_vs_8z", "corridor"]
SMACV2_ENV_NAMES = ["protoss", "terran", "zeng"]
MAMUJOCO_ENV_NAMES = ["Hopper-v2", "Ant-v2", "HalfCheetah-v2"]
SMACV1_MODES = ["poor", "medium", "good"]
SMACV2_MODES = ["5_vs_5", "10_vs_10", "10_vs_11", "20_vs_20", "20_vs_23"]
MAMUJOCO_MODES = ["expert", "medium", "medium-replay", "medium-expert"]

colors = px.colors.qualitative.Plotly
COLOR_MAPS = {
    "omiga": colors[0],
    "madice": colors[1],
    "madice-twolayer": "#ef823b",
    "icq": colors[2],
    "cql": colors[5],
    "bcq": "#4ba5ff",
    "bc": "#feb406",
    "omar": "#d366ff",
}
os.makedirs("graphs", exist_ok=True)
```

```
In [277... COLOR_MAPS
```

```
Out[277... {'omiga': '#636EFA',
'madice': '#EF553B',
'madice-twolayer': '#ef823b',
'icq': '#00CC96',
'cql': '#19D3F3',
'bcq': '#4ba5ff',
'bc': '#feb406',
'omar': '#d366ff'}
```

```
In [277... def listdir(path):
    if not os.path.exists(path):
        return []
    return sorted(os.listdir(path))
```

```
In [277... def read_tensorboard(logdir):
    files = listdir(logdir)
    if len(files) == 0:
        return {}
    path = f"{logdir}/{files[0]}"
    tb = EventAccumulator(path)
    tb.Reload()
    data = {}
    for tag in ["return", "winrate"]:
        if f"game/{tag}" in tb.Tags()["scalars"]:
            for item in tb.Scalars(f"game/{tag}"):
                if item.step not in data:
                    data[item.step] = {}
                data[item.step][tag] = item.value
    return data
```

```
In [277... def create_tasks(algo, env_name, mode):
    for seed in listdir(f"{LOGDIR}/{algo}/{env_name}/{mode}"):
        for alpha in listdir(f"{LOGDIR}/{algo}/{env_name}/{mode}/{seed}"):
            for f_func in listdir(f"{LOGDIR}/{algo}/{env_name}/{mode}/{seed}/{alpha}"):
                logdir = f"{LOGDIR}/{algo}/{env_name}/{mode}/{seed}/{alpha}/{f_func}"
                yield logdir, alpha, f_func
```

```
In [277... def create_smacv1_tasks(p):
    tasks = []
    for algo in ALGOS:
        for env_name in SMACV1_ENV_NAMES:
            for mode in SMACV1_MODES:
                for logdir, alpha, f_func in create_tasks(algo, env_name, mode):
                    tasks.append((p.submit(read_tensorboard, logdir), env_name, mode, algo, alpha, f_func))
    return tasks
```

```
In [277... def create_smacv2_tasks(p):
    tasks = []
    for algo in ALGOS:
        for env_name in SMACV2_ENV_NAMES:
            for mode in SMACV2_MODES:
                for logdir, alpha, f_func in create_tasks(algo, f"{env_name}_{mode}", "medium"):
                    tasks.append((p.submit(read_tensorboard, logdir), env_name, mode, algo, alpha, f_func))
    return tasks
```

```
In [277... def create_mamujoco_tasks(p):
    tasks = []
    for algo in ALGOS:
        for env_name in MAMUJOCO_ENV_NAMES:
            for mode in MAMUJOCO_MODES:
                for logdir, alpha, f_func in create_tasks(algo, env_name, mode):
                    tasks.append((p.submit(read_tensorboard, logdir), env_name, mode, algo, alpha, f_func))
    return tasks
```

```
In [278... results = {}
with Pool() as p:
    tasks = []
    tasks += create_smacv1_tasks(p)
    tasks += create_smacv2_tasks(p)
    tasks += create_mamujoco_tasks(p)

    for task, env_name, mode, algo, alpha, f_func in tqdm(tasks):
        data = task.result()
        if len(data) == 0:
            continue
        color = COLOR_MAPS[algo]
        if algo == "madice":
            algo = "ComaDICE (ours)"
        elif algo == "madice-twolayer":
            algo = "ComaDICE (2-layer)"
        else:
            algo = algo.upper()
        COLOR_MAPS[algo] = color
        if (env_name, mode) not in results:
            results[(env_name, mode)] = {}
        if (algo, alpha, f_func) not in results[(env_name, mode)]:
            results[(env_name, mode)][(algo, alpha, f_func)] = []
        results[(env_name, mode)][(algo, alpha, f_func)].append(data)
```

100%|██████████| 2730/2730 [00:00<00:00, 480142.99it/s]

```
In [278... os.makedirs("saved_results", exist_ok=True)
with open("saved_results/log_data.pkl", "wb") as f:
    pickle.dump(data, f)
```

```
In [278... main_results = {}
for (env_name, mode), data in results.items():
    for (algo, alpha, f_func), items in data.items():
        if alpha != "alpha10" or f_func != "soft_chisquare":
            continue
        if "2-layer" in algo:
            continue
        if (env_name, mode) not in main_results:
            main_results[(env_name, mode)] = {}
        main_results[(env_name, mode)][algo] = items
```

```
In [278... ablation_results = {}
for (env_name, mode), data in results.items():
    for (algo, alpha, f_func), items in data.items():
        if algo != "ComaDICE (ours)":
            continue
        if (env_name, mode) not in ablation_results:
            ablation_results[(env_name, mode)] = {}
        ablation_results[(env_name, mode)][(alpha, f_func)] = items
```

```
In [278... ablation_mixer_results = {}
for (env_name, mode), data in results.items():
    for (algo, alpha, f_func), items in data.items():
        if alpha != "alpha10" or f_func != "soft_chisquare":
            continue
        if "ComaDICE" not in algo:
            continue
        if (env_name, mode) not in ablation_mixer_results:
            ablation_mixer_results[(env_name, mode)] = {}
        ablation_mixer_results[(env_name, mode)][algo] = items
```

```
In [278... def analyze(items, tag="return"):
    if not isinstance(items, list):
        return np.nan
    items = [item[max(item.keys())] for item in items]
    items = [item[tag] for item in items if tag in item]
    if len(items) == 0:
        return np.nan
    mean = np.mean(items)
    std = np.std(items)
    if tag == "winrate":
        return f"{mean*100:.2f}±{std*100:.2f}"
    else:
        return f"{mean:.2f}±{std:.2f}"
```

```
In [278... pd.DataFrame.from_dict(main_results).map(analyze, tag="return").T
```

|                |               | BC             | BCQ             | CQL             | ICQ            | OMAR             | OMIGA          | ComaDICE (ours) |
|----------------|---------------|----------------|-----------------|-----------------|----------------|------------------|----------------|-----------------|
| 2c_vs_64zg     | poor          | 11.56±0.39     | 12.46±0.18      | 10.83±0.51      | 12.56±0.18     | 11.33±0.50       | 13.02±0.66     | 12.15±0.51      |
|                | medium        | 13.37±1.87     | 15.58±0.37      | 12.82±1.61      | 15.57±0.61     | 10.20±0.20       | 16.03±0.19     | 16.30±0.66      |
|                | good          | 17.90±1.30     | 19.13±0.27      | 18.48±0.95      | 18.82±0.17     | 17.27±0.78       | 19.15±0.32     | 20.34±0.06      |
| 5m_vs_6m       | poor          | 6.98±0.47      | 7.61±0.36       | 7.43±0.10       | 7.26±0.19      | 7.27±0.42        | 7.52±0.21      | 8.12±0.55       |
|                | medium        | 7.05±0.82      | 7.58±0.10       | 7.78±0.10       | 7.77±0.30      | 7.08±0.51        | 7.92±0.57      | 8.65±0.38       |
|                | good          | 6.95±0.47      | 7.76±0.15       | 8.08±0.21       | 7.87±0.30      | 7.40±0.63        | 8.25±0.37      | 8.66±0.50       |
| 6h_vs_8z       | poor          | 8.57±0.81      | 10.84±0.16      | 10.81±0.52      | 10.55±0.10     | 10.63±0.25       | 11.31±0.19     | 11.37±0.58      |
|                | medium        | 9.46±0.35      | 11.77±0.16      | 11.29±0.29      | 11.13±0.33     | 10.36±0.16       | 12.19±0.22     | 12.83±0.22      |
|                | good          | 10.02±1.67     | 12.19±0.23      | 10.44±0.20      | 11.81±0.12     | 9.85±0.28        | 12.54±0.21     | 13.11±0.46      |
| corridor       | poor          | 2.91±0.57      | 4.47±0.94       | 4.08±0.60       | 4.47±0.33      | 4.28±0.49        | 5.61±0.35      | 6.36±0.47       |
|                | medium        | 7.39±0.79      | 10.82±0.92      | 7.04±0.66       | 11.30±1.57     | 7.26±0.71        | 11.66±1.30     | 12.90±0.62      |
|                | good          | 10.81±2.61     | 15.24±1.21      | 5.22±0.81       | 15.54±1.12     | 6.74±0.69        | 15.88±0.89     | 17.98±0.08      |
| protoss        | 5_vs_5        | 13.24±0.68     | 6.84±1.61       | 9.31±1.64       | 10.72±1.16     | 8.89±0.83        | 14.32±1.37     | 14.41±1.15      |
|                | 10_vs_10      | 12.00±1.91     | 7.72±1.32       | 11.27±0.92      | 10.42±1.57     | 8.76±0.57        | 14.23±1.48     | 14.55±1.81      |
|                | 10_vs_11      | 11.17±0.53     | 5.18±1.43       | 7.95±0.76       | 10.33±0.66     | 8.04±0.26        | 12.07±0.49     | 13.18±0.86      |
|                | 20_vs_20      | 13.14±0.45     | 4.82±0.58       | 10.49±0.94      | 11.79±0.49     | 9.09±0.48        | 13.96±0.92     | 14.83±0.99      |
|                | 20_vs_23      | 11.20±0.52     | 3.54±0.64       | 5.57±0.75       | 10.20±0.67     | 7.41±0.67        | 12.98±1.11     | 13.26±0.90      |
| terran         | 5_vs_5        | 10.83±1.44     | 6.36±1.05       | 6.51±0.86       | 6.78±0.58      | 6.95±0.59        | 10.46±1.25     | 10.70±1.53      |
|                | 10_vs_10      | 10.30±0.33     | 4.58±0.40       | 6.82±0.62       | 8.75±1.45      | 7.62±1.00        | 10.08±0.65     | 11.82±0.90      |
|                | 10_vs_11      | 8.98±0.69      | 3.61±1.14       | 5.46±0.23       | 5.52±0.87      | 5.90±0.68        | 8.80±1.35      | 9.40±0.95       |
|                | 20_vs_20      | 10.81±0.77     | 3.95±0.60       | 4.32±0.61       | 8.33±0.31      | 7.31±0.36        | 10.52±0.71     | 11.81±0.46      |
|                | 20_vs_23      | 7.20±0.98      | 1.22±0.97       | 1.63±0.20       | 5.33±0.52      | 5.10±0.30        | 7.94±0.60      | 8.21±0.72       |
| zerg           | 5_vs_5        | 10.49±2.22     | 6.57±0.22       | 6.68±0.52       | 6.54±0.89      | 7.75±0.90        | 8.89±1.09      | 10.68±1.96      |
|                | 10_vs_10      | 10.96±0.78     | 7.27±1.05       | 7.19±0.29       | 7.74±1.14      | 7.49±0.81        | 11.81±1.60     | 11.46±0.95      |
|                | 10_vs_11      | 9.23±1.11      | 7.60±0.87       | 6.73±0.45       | 6.79±0.95      | 6.48±0.96        | 9.51±1.19      | 11.01±0.94      |
|                | 20_vs_20      | 9.28±0.47      | 3.69±0.40       | 4.69±0.26       | 6.89±0.49      | 6.92±0.84        | 9.16±0.50      | 9.42±1.16       |
|                | 20_vs_23      | 8.54±0.73      | 3.28±0.30       | 4.15±0.63       | 6.95±0.46      | 5.67±0.42        | 9.81±0.58      | 10.51±0.79      |
| Hopper-v2      | expert        | 209.85±191.12  | 77.85±58.04     | 159.14±313.83   | 754.74±806.28  | 2.36±1.46        | 859.63±709.47  | 2827.70±62.91   |
|                | medium        | 511.95±7.43    | 44.58±20.62     | 401.27±199.88   | 501.79±14.03   | 21.34±24.90      | 1189.26±544.30 | 822.55±66.21    |
|                | medium-replay | 133.31±53.54   | 26.53±24.04     | 31.37±15.16     | 195.39±103.61  | 3.30±3.22        | 774.18±494.27  | 906.25±242.13   |
|                | medium-expert | 155.30±111.53  | 54.31±23.66     | 64.82±123.31    | 355.44±373.86  | 1.44±0.86        | 709.00±595.66  | 1362.44±522.87  |
| Ant-v2         | expert        | 2046.31±6.18   | 1317.73±286.28  | 1042.39±2021.64 | 2050.00±11.86  | 312.54±297.48    | 2055.46±1.58   | 2056.89±5.92    |
|                | medium        | 1421.09±7.88   | 1059.60±91.22   | 533.90±1766.43  | 1412.41±10.93  | -1710.04±1588.98 | 1418.44±5.36   | 1425.00±2.87    |
|                | medium-replay | 994.00±20.29   | 950.77±48.76    | 234.62±1618.25  | 1016.68±53.51  | -2014.20±844.68  | 1105.13±88.87  | 1122.94±61.04   |
|                | medium-expert | 1561.70±64.81  | 1020.89±242.74  | 800.22±1621.47  | 1590.18±85.61  | -2992.80±6.95    | 1720.33±110.63 | 1813.88±68.37   |
| HalfCheetah-v2 | expert        | 3251.22±386.83 | 2992.71±629.65  | 1189.54±1034.49 | 2955.94±459.19 | -206.73±161.12   | 3383.61±552.67 | 4082.93±45.68   |
|                | medium        | 2280.32±178.22 | 2590.47±1110.35 | 1011.35±1016.94 | 2549.27±96.34  | -265.68±146.98   | 3608.13±237.37 | 2664.71±54.19   |
|                | medium-replay | 1886.20±390.77 | -333.64±152.06  | 1998.67±693.92  | 1922.42±612.87 | -235.42±154.89   | 2504.70±83.47  | 2855.02±242.25  |
|                | medium-expert | 2451.95±782.99 | 3543.70±780.89  | 1194.23±1081.05 | 2833.99±420.32 | -253.84±63.94    | 2948.46±518.89 | 3889.74±81.64   |

```
pd.DataFrame.from_dict(ablation_results).map(analyze, tag="return").T
```

|                |               | alpha0.01      | alpha0.1       | alpha1          |                |                 | alpha10        | alpha100       |
|----------------|---------------|----------------|----------------|-----------------|----------------|-----------------|----------------|----------------|
|                |               | soft_chisquare | soft_chisquare | soft_chisquare  | chisquare      | kl              | soft_chisquare | soft_chisquare |
| 2c_vs_64zg     | poor          | 10.56±0.54     | 11.08±0.36     | 11.12±0.13      | 11.64±0.24     | 11.10±0.31      | 12.15±0.51     | 11.78±0.22     |
|                | medium        | 9.63±0.46      | 13.07±0.78     | 12.54±2.39      | 16.06±0.59     | 15.69±0.26      | 16.30±0.66     | 16.00±0.25     |
|                | good          | 11.05±1.39     | 9.58±2.67      | 17.43±0.50      | 19.74±0.10     | 19.30±0.06      | 20.34±0.06     | 19.91±0.07     |
| 5m_vs_6m       | poor          | 5.71±0.11      | 5.06±0.26      | 7.08±0.71       | 7.78±0.37      | 7.49±0.49       | 8.12±0.55      | 7.67±0.29      |
|                | medium        | 5.60±0.14      | 5.29±0.16      | 7.77±0.77       | 8.09±0.46      | 7.74±0.39       | 8.65±0.38      | 8.47±0.67      |
|                | good          | 5.72±0.10      | 5.70±0.19      | 7.75±0.49       | 8.68±0.57      | 8.11±0.44       | 8.66±0.50      | 8.81±0.76      |
| 6h_vs_8z       | poor          | 8.54±0.24      | 9.60±0.28      | 10.00±0.33      | 10.54±0.26     | 10.00±0.20      | 11.37±0.58     | 10.69±0.36     |
|                | medium        | 8.54±0.59      | 10.47±0.80     | 10.75±0.49      | 12.87±0.37     | 12.43±0.48      | 12.83±0.22     | 12.27±0.32     |
|                | good          | 7.87±0.11      | 9.50±0.55      | 11.34±0.56      | 12.70±0.38     | 12.42±0.47      | 13.11±0.46     | 12.76±0.45     |
| corridor       | poor          | 2.07±0.43      | 3.73±0.96      | 6.09±0.83       | 6.47±0.49      | 6.09±0.43       | 6.36±0.47      | 4.97±1.06      |
|                | medium        | 1.68±1.03      | 2.22±1.66      | 11.34±0.29      | 12.67±0.73     | 11.98±0.67      | 12.90±0.62     | 13.34±0.13     |
|                | good          | 4.74±2.39      | 3.82±4.99      | 15.66±0.29      | 17.34±0.13     | 16.90±0.10      | 17.98±0.08     | 17.42±0.13     |
| protoss        | 5_vs_5        | 12.21±1.05     | 13.08±1.28     | 13.22±1.06      | 14.63±0.54     | 13.55±0.94      | 14.41±1.15     | 14.04±2.02     |
|                | 10_vs_10      | 12.85±0.89     | 13.98±0.84     | 13.44±1.19      | 14.70±1.30     | 13.69±1.60      | 14.55±1.81     | 14.12±1.30     |
|                | 10_vs_11      | 9.89±1.09      | 11.14±0.78     | 11.29±1.20      | 12.79±1.04     | 11.42±1.72      | 13.18±0.86     | 12.17±1.07     |
|                | 20_vs_20      | 10.25±0.53     | 11.12±1.02     | 12.22±0.85      | 12.72±0.29     | 13.14±0.74      | 14.83±0.99     | 13.19±0.40     |
|                | 20_vs_23      | 7.98±2.32      | 11.22±1.22     | 11.70±0.56      | 12.44±0.94     | 12.48±0.74      | 13.26±0.90     | 13.17±0.51     |
| terran         | 5_vs_5        | 11.06±1.83     | 10.09±1.16     | 9.01±0.98       | 11.12±1.22     | 12.71±2.01      | 10.70±1.53     | 12.61±1.94     |
|                | 10_vs_10      | 8.51±0.76      | 10.34±0.66     | 10.39±1.14      | 9.77±0.94      | 10.66±1.32      | 11.82±0.90     | 11.76±1.71     |
|                | 10_vs_11      | 7.46±0.71      | 8.57±2.10      | 8.49±1.64       | 8.87±0.83      | 8.95±1.01       | 9.40±0.95      | 9.59±0.86      |
|                | 20_vs_20      | 6.24±1.13      | 6.42±1.71      | 9.06±0.71       | 10.54±0.47     | 10.19±0.66      | 11.81±0.46     | 9.29±0.58      |
|                | 20_vs_23      | 5.47±1.14      | 6.48±1.61      | 6.47±0.75       | 8.23±0.39      | 7.42±0.66       | 8.21±0.72      | 8.22±0.37      |
| zerg           | 5_vs_5        | 7.89±0.64      | 9.34±0.86      | 10.53±1.38      | 10.00±0.79     | 9.62±1.54       | 10.68±1.96     | 10.41±1.20     |
|                | 10_vs_10      | 10.85±1.46     | 11.42±1.52     | 11.77±0.70      | 12.43±1.18     | 10.35±1.07      | 11.46±0.95     | 10.90±2.18     |
|                | 10_vs_11      | 10.09±2.48     | 9.07±1.22      | 9.96±1.23       | 8.94±0.40      | 9.11±1.08       | 11.01±0.94     | 9.79±0.81      |
|                | 20_vs_20      | 7.99±0.48      | 9.20±1.34      | 9.20±1.02       | 9.05±0.80      | 9.03±0.63       | 9.42±1.16      | 10.49±0.87     |
|                | 20_vs_23      | 9.07±1.09      | 9.97±0.66      | 10.43±0.63      | 10.19±1.00     | 9.33±0.84       | 10.51±0.79     | 10.07±0.71     |
| Hopper-v2      | expert        | 147.31±67.94   | 107.85±65.54   | 545.67±820.56   | 2625.00±191.34 | 2018.73±972.03  | 2827.70±62.91  | 2690.72±58.63  |
|                | medium        | 149.62±96.75   | 107.54±66.86   | 244.66±267.46   | 794.41±69.19   | 295.53±227.14   | 822.55±66.21   | 807.53±122.18  |
|                | medium-replay | 165.64±104.09  | 109.56±38.68   | 155.60±61.61    | 221.32±57.96   | 129.87±54.99    | 906.25±242.13  | 186.50±16.77   |
|                | medium-expert | 119.12±77.13   | 95.57±69.53    | 58.75±26.06     | 1294.12±520.44 | 105.48±103.86   | 1362.44±522.87 | 1358.44±595.05 |
| Ant-v2         | expert        | 1016.36±196.48 | 1179.05±273.70 | 1927.73±174.10  | 1945.24±2.85   | 1884.13±27.83   | 2056.89±5.92   | 1949.99±3.28   |
|                | medium        | 907.33±32.23   | 1000.05±90.37  | 1424.33±3.09    | 1359.18±3.21   | 1346.22±49.81   | 1425.00±2.87   | 1354.59±2.48   |
|                | medium-replay | 969.09±21.92   | 978.43±39.59   | 944.59±28.94    | 1111.12±57.78  | 987.50±33.87    | 1122.94±61.04  | 1072.06±41.44  |
|                | medium-expert | 915.76±364.10  | 1132.93±282.16 | 738.47±250.19   | 1655.94±42.83  | 1182.46±405.08  | 1813.88±68.37  | 1559.59±86.77  |
| HalfCheetah-v2 | expert        | 1068.91±635.24 | 935.17±905.86  | 3636.95±80.87   | 3860.59±91.48  | 3829.99±88.77   | 4082.93±45.68  | 3843.72±149.37 |
|                | medium        | 575.92±724.82  | 445.19±403.87  | 2690.00±92.38   | 2532.35±81.86  | 2347.82±171.77  | 2664.71±54.19  | 2523.43±59.03  |
|                | medium-replay | 412.30±310.54  | 233.49±270.11  | 861.58±173.54   | 2729.93±241.49 | 1258.49±1015.37 | 2855.02±242.25 | 2557.37±241.46 |
|                | medium-expert | -107.50±298.07 | -275.92±544.54 | 1136.90±1608.33 | 3665.17±74.03  | 3601.04±155.60  | 3889.74±81.64  | 3605.58±70.37  |

```
pd.DataFrame.from_dict(ablation_mixer_results).map(analyze, tag="return").T
```



|                |               | ComaDICE (ours) | ComaDICE (2-layer) |
|----------------|---------------|-----------------|--------------------|
| 2c_vs_64zg     | poor          | 12.15±0.51      | 11.45±0.88         |
|                | medium        | 16.30±0.66      | 11.21±0.85         |
|                | good          | 20.34±0.06      | 9.01±2.19          |
| 5m_vs_6m       | poor          | 8.12±0.55       | 3.81±1.10          |
|                | medium        | 8.65±0.38       | 0.78±0.27          |
|                | good          | 8.66±0.50       | 7.69±0.14          |
| 6h_vs_8z       | poor          | 11.37±0.58      | 10.30±0.34         |
|                | medium        | 12.83±0.22      | 9.06±0.62          |
|                | good          | 13.11±0.46      | 8.30±0.49          |
| corridor       | poor          | 6.36±0.47       | 1.47±0.75          |
|                | medium        | 12.90±0.62      | 3.90±1.70          |
|                | good          | 17.98±0.08      | 2.55±2.30          |
| protoss        | 5_vs_5        | 14.41±1.15      | 10.54±1.45         |
|                | 10_vs_10      | 14.55±1.81      | 11.23±1.61         |
|                | 10_vs_11      | 13.18±0.86      | 9.48±0.45          |
|                | 20_vs_20      | 14.83±0.99      | 9.54±0.90          |
|                | 20_vs_23      | 13.26±0.90      | 7.09±2.16          |
| terran         | 5_vs_5        | 10.70±1.53      | 8.30±0.80          |
|                | 10_vs_10      | 11.82±0.90      | 8.84±1.08          |
|                | 10_vs_11      | 9.40±0.95       | 6.36±1.16          |
|                | 20_vs_20      | 11.81±0.46      | 7.80±0.93          |
|                | 20_vs_23      | 8.21±0.72       | 6.61±0.89          |
| zerg           | 5_vs_5        | 10.68±1.96      | 7.77±1.15          |
|                | 10_vs_10      | 11.46±0.95      | 9.69±0.61          |
|                | 10_vs_11      | 11.01±0.94      | 7.85±0.71          |
|                | 20_vs_20      | 9.42±1.16       | 7.85±0.57          |
|                | 20_vs_23      | 10.51±0.79      | 8.02±0.52          |
| Hopper-v2      | expert        | 2827.70±62.91   | 483.74±349.69      |
|                | medium        | 822.55±66.21    | 648.40±245.89      |
|                | medium-replay | 906.25±242.13   | 441.87±260.77      |
|                | medium-expert | 1362.44±522.87  | 402.28±288.17      |
| Ant-v2         | expert        | 2056.89±5.92    | 1582.97±160.42     |
|                | medium        | 1425.00±2.87    | 1198.87±53.92      |
|                | medium-replay | 1122.94±61.04   | 1041.78±38.41      |
|                | medium-expert | 1813.88±68.37   | 1426.63±171.41     |
| HalfCheetah-v2 | expert        | 4082.93±45.68   | 2159.39±658.01     |
|                | medium        | 2664.71±54.19   | 2026.66±244.30     |
|                | medium-replay | 2855.02±242.25  | 1299.18±196.11     |
|                | medium-expert | 3889.74±81.64   | 1336.27±381.88     |

```
pd.DataFrame.from_dict(main_results).map(analyze, tag="winrate").T
```

|                |               | BC          | BCQ        | CQL         | ICQ        | OMAR       | OMIGA       | ComaDICE (ours) |
|----------------|---------------|-------------|------------|-------------|------------|------------|-------------|-----------------|
| 2c_vs_64zg     | poor          | 0.00±0.00   | 0.00±0.00  | 0.00±0.00   | 0.00±0.00  | 0.00±0.00  | 0.00±0.00   | 0.62±1.25       |
|                | medium        | 1.88±1.53   | 2.50±3.64  | 2.50±3.64   | 1.88±1.53  | 1.25±1.53  | 6.25±5.59   | 8.75±6.96       |
|                | good          | 31.25±9.88  | 35.62±8.75 | 44.38±13.02 | 28.75±4.59 | 28.75±9.14 | 40.62±9.48  | 55.00±1.53      |
| 5m_vs_6m       | poor          | 2.50±1.25   | 1.25±1.53  | 1.25±1.53   | 1.25±1.53  | 0.62±1.25  | 6.88±1.25   | 4.38±4.24       |
|                | medium        | 1.88±1.53   | 1.25±1.53  | 2.50±1.25   | 1.25±1.53  | 0.62±1.25  | 2.50±3.06   | 7.50±2.50       |
|                | good          | 2.50±2.34   | 1.88±2.50  | 1.88±1.53   | 3.75±2.34  | 3.75±1.25  | 6.88±1.25   | 8.12±3.19       |
| 6h_vs_8z       | poor          | 0.00±0.00   | 0.00±0.00  | 0.00±0.00   | 0.00±0.00  | 0.00±0.00  | 0.00±0.00   | 1.88±3.75       |
|                | medium        | 1.88±1.53   | 1.88±1.53  | 1.88±1.53   | 2.50±1.25  | 1.88±1.53  | 1.25±1.53   | 3.12±1.98       |
|                | good          | 8.75±1.25   | 8.75±3.64  | 7.50±1.53   | 9.38±1.98  | 0.62±1.25  | 5.62±3.64   | 11.25±5.45      |
| corridor       | poor          | 0.00±0.00   | 0.00±0.00  | 0.00±0.00   | 0.62±1.25  | 0.00±0.00  | 0.00±0.00   | 0.62±1.25       |
|                | medium        | 15.00±2.34  | 23.12±1.53 | 14.37±1.53  | 22.50±3.06 | 11.88±2.34 | 23.75±5.08  | 27.34±3.41      |
|                | good          | 30.63±4.15  | 42.50±6.43 | 5.62±1.25   | 42.50±6.43 | 3.12±0.00  | 41.88±6.43  | 48.75±2.50      |
| protoss        | 5_vs_5        | 36.88±8.71  | 16.25±2.34 | 10.00±4.15  | 36.88±9.14 | 21.25±4.15 | 33.12±5.45  | 46.25±6.06      |
|                | 10_vs_10      | 36.25±10.57 | 9.38±5.59  | 26.25±7.55  | 28.12±6.56 | 13.75±7.02 | 40.00±10.72 | 50.62±8.71      |
|                | 10_vs_11      | 19.38±4.59  | 10.00±4.15 | 10.62±5.45  | 12.50±4.42 | 12.50±3.42 | 16.25±6.06  | 20.00±4.24      |
|                | 20_vs_20      | 37.50±4.42  | 6.25±1.98  | 11.88±4.15  | 32.50±8.05 | 23.75±2.50 | 36.25±5.08  | 47.50±7.76      |
|                | 20_vs_23      | 13.75±1.53  | 1.25±1.53  | 0.00±0.00   | 12.50±5.59 | 11.25±7.81 | 12.50±8.15  | 13.75±5.80      |
| terran         | 5_vs_5        | 30.00±4.24  | 12.50±6.25 | 9.38±7.91   | 23.12±5.80 | 14.37±4.68 | 28.12±4.42  | 30.63±8.24      |
|                | 10_vs_10      | 29.38±5.80  | 6.88±6.06  | 9.38±5.59   | 16.88±5.80 | 15.00±4.59 | 29.38±3.19  | 32.50±5.80      |
|                | 10_vs_11      | 16.25±3.64  | 3.75±4.59  | 7.50±6.43   | 5.00±4.24  | 9.38±5.59  | 12.50±5.23  | 19.38±5.38      |
|                | 20_vs_20      | 26.25±10.38 | 5.00±3.19  | 10.62±4.24  | 15.62±3.42 | 7.50±7.29  | 21.88±4.42  | 29.38±3.75      |
|                | 20_vs_23      | 4.38±4.24   | 0.00±0.00  | 0.00±0.00   | 7.50±6.12  | 5.00±4.24  | 4.38±2.50   | 9.38±5.23       |
| zerg           | 5_vs_5        | 26.88±10.00 | 14.37±4.24 | 14.37±5.80  | 18.75±7.13 | 13.75±6.12 | 21.88±5.93  | 31.25±7.65      |
|                | 10_vs_10      | 25.00±2.80  | 5.62±4.59  | 5.62±4.59   | 15.62±7.40 | 19.38±2.34 | 23.75±6.43  | 33.75±11.76     |
|                | 10_vs_11      | 13.75±4.68  | 9.38±5.23  | 6.25±4.42   | 10.62±6.73 | 10.62±3.75 | 13.75±6.73  | 19.38±3.64      |
|                | 20_vs_20      | 8.12±1.53   | 2.50±1.25  | 1.25±1.53   | 10.00±7.76 | 12.50±4.42 | 10.00±2.34  | 9.38±6.25       |
|                | 20_vs_23      | 7.50±3.19   | 0.62±1.25  | 1.25±1.53   | 7.50±3.19  | 3.75±2.34  | 4.38±4.24   | 11.25±4.24      |
| Hopper-v2      | expert        | NaN         | NaN        | NaN         | NaN        | NaN        | NaN         | NaN             |
|                | medium        | NaN         | NaN        | NaN         | NaN        | NaN        | NaN         | NaN             |
|                | medium-replay | NaN         | NaN        | NaN         | NaN        | NaN        | NaN         | NaN             |
|                | medium-expert | NaN         | NaN        | NaN         | NaN        | NaN        | NaN         | NaN             |
| Ant-v2         | expert        | NaN         | NaN        | NaN         | NaN        | NaN        | NaN         | NaN             |
|                | medium        | NaN         | NaN        | NaN         | NaN        | NaN        | NaN         | NaN             |
|                | medium-replay | NaN         | NaN        | NaN         | NaN        | NaN        | NaN         | NaN             |
|                | medium-expert | NaN         | NaN        | NaN         | NaN        | NaN        | NaN         | NaN             |
| HalfCheetah-v2 | expert        | NaN         | NaN        | NaN         | NaN        | NaN        | NaN         | NaN             |
|                | medium        | NaN         | NaN        | NaN         | NaN        | NaN        | NaN         | NaN             |
|                | medium-replay | NaN         | NaN        | NaN         | NaN        | NaN        | NaN         | NaN             |
|                | medium-expert | NaN         | NaN        | NaN         | NaN        | NaN        | NaN         | NaN             |

```
pd.DataFrame.from_dict(ablation_results).map(analyze, tag="winrate").T
```

|                |               | alpha0.01      | alpha0.1       | alpha1         |             |             | alpha10        | alpha100       |
|----------------|---------------|----------------|----------------|----------------|-------------|-------------|----------------|----------------|
|                |               | soft_chisquare | soft_chisquare | soft_chisquare | chisquare   | kl          | soft_chisquare | soft_chisquare |
| 2c_vs_64zg     | poor          | 0.00±0.00      | 0.00±0.00      | 0.00±0.00      | 0.00±0.00   | 0.00±0.00   | 0.62±1.25      | 0.62±1.25      |
|                | medium        | 0.00±0.00      | 1.88±3.75      | 5.00±5.08      | 13.12±4.59  | 10.62±3.75  | 8.75±6.96      | 8.75±4.59      |
|                | good          | 0.62±1.25      | 0.00±0.00      | 40.62±3.95     | 55.62±3.06  | 54.37±1.53  | 55.00±1.53     | 51.88±1.53     |
| 5m_vs_6m       | poor          | 0.00±0.00      | 0.00±0.00      | 4.38±4.68      | 3.75±3.06   | 3.75±3.64   | 4.38±4.24      | 1.88±1.53      |
|                | medium        | 0.00±0.00      | 0.00±0.00      | 8.12±6.43      | 6.25±2.80   | 5.00±3.75   | 7.50±2.50      | 7.50±3.75      |
|                | good          | 0.00±0.00      | 0.00±0.00      | 6.25±4.42      | 8.75±3.64   | 6.88±3.06   | 8.12±3.19      | 10.00±6.06     |
| 6h_vs_8z       | poor          | 0.00±0.00      | 0.00±0.00      | 1.88±3.75      | 0.00±0.00   | 0.00±0.00   | 1.88±3.75      | 0.62±1.25      |
|                | medium        | 0.00±0.00      | 0.62±1.25      | 1.88±1.53      | 5.00±2.50   | 5.00±3.75   | 3.12±1.98      | 3.12±1.98      |
|                | good          | 0.00±0.00      | 0.00±0.00      | 7.50±5.80      | 9.38±4.42   | 9.38±1.98   | 11.25±5.45     | 7.50±7.29      |
| corridor       | poor          | 0.00±0.00      | 0.62±1.25      | 0.00±0.00      | 1.25±1.53   | 1.25±1.53   | 0.62±1.25      | 1.25±1.53      |
|                | medium        | 0.00±0.00      | 0.00±0.00      | 30.00±5.08     | 31.25±6.25  | 28.12±5.93  | 27.34±3.41     | 34.38±2.80     |
|                | good          | 0.00±0.00      | 4.38±8.75      | 48.75±4.68     | 49.38±5.38  | 48.12±1.53  | 48.75±2.50     | 49.38±3.64     |
| protoss        | 5_vs_5        | 20.62±10.00    | 31.87±6.06     | 50.00±2.80     | 52.50±4.15  | 46.25±7.23  | 46.25±6.06     | 46.25±8.48     |
|                | 10_vs_10      | 19.38±6.06     | 25.00±3.42     | 45.00±11.11    | 48.12±7.55  | 55.00±9.80  | 50.62±8.71     | 51.25±7.55     |
|                | 10_vs_11      | 0.00±0.00      | 6.25±9.68      | 18.75±8.15     | 22.50±8.71  | 20.62±6.12  | 20.00±4.24     | 29.38±8.29     |
|                | 20_vs_20      | 1.25±1.53      | 8.75±7.76      | 28.12±8.62     | 38.12±2.34  | 41.25±7.76  | 47.50±7.76     | 40.62±6.25     |
|                | 20_vs_23      | 0.00±0.00      | 1.88±2.50      | 9.38±6.56      | 16.88±4.24  | 15.00±3.64  | 13.75±5.80     | 17.50±5.08     |
| terran         | 5_vs_5        | 25.62±4.59     | 22.50±7.23     | 30.63±4.15     | 41.25±7.23  | 38.75±10.57 | 30.63±8.24     | 41.25±4.59     |
|                | 10_vs_10      | 15.00±8.71     | 28.75±7.23     | 33.75±9.35     | 30.63±4.15  | 36.25±10.75 | 32.50±5.80     | 43.75±7.13     |
|                | 10_vs_11      | 3.75±2.34      | 13.75±9.19     | 14.37±9.19     | 15.62±11.52 | 15.00±7.50  | 19.38±5.38     | 16.25±10.35    |
|                | 20_vs_20      | 0.62±1.25      | 2.50±3.64      | 18.75±1.98     | 33.75±6.37  | 28.75±11.76 | 29.38±3.75     | 21.88±3.42     |
|                | 20_vs_23      | 0.62±1.25      | 2.50±3.64      | 2.50±3.64      | 5.62±4.15   | 8.12±4.24   | 9.38±5.23      | 6.25±1.98      |
| zerg           | 5_vs_5        | 10.00±4.59     | 20.00±5.80     | 28.75±4.59     | 29.38±8.97  | 33.12±13.35 | 31.25±7.65     | 25.00±8.62     |
|                | 10_vs_10      | 13.75±8.97     | 20.62±8.29     | 29.38±8.97     | 31.25±7.65  | 26.25±5.08  | 33.75±11.76    | 31.87±6.67     |
|                | 10_vs_11      | 9.38±9.48      | 12.50±6.85     | 16.88±3.19     | 11.25±1.53  | 16.25±7.23  | 19.38±3.64     | 17.50±9.19     |
|                | 20_vs_20      | 0.00±0.00      | 1.88±1.53      | 6.88±6.06      | 7.50±3.19   | 11.25±7.02  | 9.38±6.25      | 12.50±3.95     |
|                | 20_vs_23      | 1.25±1.53      | 3.75±2.34      | 12.50±3.95     | 10.62±3.19  | 10.00±2.34  | 11.25±4.24     | 11.88±6.06     |
| Hopper-v2      | expert        | NaN            | NaN            | NaN            | NaN         | NaN         | NaN            | NaN            |
|                | medium        | NaN            | NaN            | NaN            | NaN         | NaN         | NaN            | NaN            |
|                | medium-replay | NaN            | NaN            | NaN            | NaN         | NaN         | NaN            | NaN            |
|                | medium-expert | NaN            | NaN            | NaN            | NaN         | NaN         | NaN            | NaN            |
| Ant-v2         | expert        | NaN            | NaN            | NaN            | NaN         | NaN         | NaN            | NaN            |
|                | medium        | NaN            | NaN            | NaN            | NaN         | NaN         | NaN            | NaN            |
|                | medium-replay | NaN            | NaN            | NaN            | NaN         | NaN         | NaN            | NaN            |
|                | medium-expert | NaN            | NaN            | NaN            | NaN         | NaN         | NaN            | NaN            |
| HalfCheetah-v2 | expert        | NaN            | NaN            | NaN            | NaN         | NaN         | NaN            | NaN            |
|                | medium        | NaN            | NaN            | NaN            | NaN         | NaN         | NaN            | NaN            |
|                | medium-replay | NaN            | NaN            | NaN            | NaN         | NaN         | NaN            | NaN            |
|                | medium-expert | NaN            | NaN            | NaN            | NaN         | NaN         | NaN            | NaN            |

```
pd.DataFrame.from_dict(ablation_mixer_results).map(analyze, tag="winrate").T
```

Out[279...

|                |               | ComaDICE (ours) | ComaDICE (2-layer) |
|----------------|---------------|-----------------|--------------------|
| 2c_vs_64zg     | poor          | 0.62±1.25       | 0.00±0.00          |
|                | medium        | 8.75±6.96       | 3.75±3.64          |
|                | good          | 55.00±1.53      | 19.38±5.00         |
| 5m_vs_6m       | poor          | 4.38±4.24       | 3.12±0.00          |
|                | medium        | 7.50±2.50       | 1.25±1.53          |
|                | good          | 8.12±3.19       | 3.12±0.00          |
| 6h_vs_8z       | poor          | 1.88±3.75       | 0.00±0.00          |
|                | medium        | 3.12±1.98       | 0.00±0.00          |
|                | good          | 11.25±5.45      | 1.88±2.50          |
| corridor       | poor          | 0.62±1.25       | 0.00±0.00          |
|                | medium        | 27.34±3.41      | 11.25±2.50         |
|                | good          | 48.75±2.50      | 23.12±8.05         |
| protoss        | 5_vs_5        | 46.25±6.06      | 31.87±3.64         |
|                | 10_vs_10      | 50.62±8.71      | 32.50±5.80         |
|                | 10_vs_11      | 20.00±4.24      | 10.62±7.29         |
|                | 20_vs_20      | 47.50±7.76      | 21.88±3.95         |
|                | 20_vs_23      | 13.75±5.80      | 6.88±5.38          |
| terran         | 5_vs_5        | 30.63±8.24      | 25.62±4.59         |
|                | 10_vs_10      | 32.50±5.80      | 28.12±3.42         |
|                | 10_vs_11      | 19.38±5.38      | 12.50±3.95         |
|                | 20_vs_20      | 29.38±3.75      | 11.25±3.19         |
|                | 20_vs_23      | 9.38±5.23       | 3.12±1.98          |
| zerg           | 5_vs_5        | 31.25±7.65      | 20.62±4.68         |
|                | 10_vs_10      | 33.75±11.76     | 21.25±7.23         |
|                | 10_vs_11      | 19.38±3.64      | 13.12±4.15         |
|                | 20_vs_20      | 9.38±6.25       | 5.62±1.25          |
|                | 20_vs_23      | 11.25±4.24      | 3.12±3.42          |
| Hopper-v2      | expert        | NaN             | NaN                |
|                | medium        | NaN             | NaN                |
|                | medium-replay | NaN             | NaN                |
|                | medium-expert | NaN             | NaN                |
| Ant-v2         | expert        | NaN             | NaN                |
|                | medium        | NaN             | NaN                |
|                | medium-replay | NaN             | NaN                |
|                | medium-expert | NaN             | NaN                |
| HalfCheetah-v2 | expert        | NaN             | NaN                |
|                | medium        | NaN             | NaN                |
|                | medium-replay | NaN             | NaN                |
|                | medium-expert | NaN             | NaN                |

In [279...

```
def select_results(results, select_alpha=True, tag="return"):
    new_results = {}
    for (env_name, mode), data in results.items():
        for algo, items in data.items():
            if isinstance(algo, tuple):
                if select_alpha:
                    algo = algo[0]
                else:
                    if algo[0] != "alpha10":
                        continue
                    algo = algo[1]
            if tag == "winrate" and env_name in MAMUJOCO_ENV_NAMES:
                continue
            if env_name not in new_results:
                new_results[env_name] = defaultdict(list)
            items = [item[max(item.keys())] for item in items]
            items = [item[tag] for item in items if tag in item]
            new_results[env_name][algo] += items
    return new_results
```

In [279...

```
def create_box_figure(data, min_y, max_y, tag="return"):
    fig = go.Figure()
    for alpha, items in data.items():
        name = alpha.replace("alpha", "")
        fig.add_trace(go.Box(y=items, name=name, marker_color=colors[0], boxpoints=False))
    fig.update_layout(template='simple_white', margin=dict(l=0, r=0, t=0, b=0, pad=0, autoexpand=True))
    fig.update_layout(height=120, width=160)
    if tag == "return":
        fig.update_yaxes(range=[min_y, max_y], tickformat="~s")
    else:
        fig.update_yaxes(range=[min_y, max_y], tickformat=".0%")
    fig.update_layout(showlegend=False)
    return fig
```

In [279...

```
def show_box(alpha_box_figures, env_names, tag="returns", y_range=None):
    fig = make_subplots(rows=1, cols=len(env_names), subplot_titles=env_names)
    for i, env_name in enumerate(env_names):
```

```

plotly_fig = alpha_box_figures[env_name]
plotly_fig.write_image(f"graphs/{env_name}_box_{tag}.pdf")
fig.add_traces(plotly_fig.data, rows=1, cols=1+1)
fig.update_layout(template='simple_white', margin=dict(l=40, r=40, t=40, b=40, pad=0, autoexpand=True))
fig.update_layout(height=180, width=200*len(env_names))
if tag == "winrates":
    tickformat = ".0%"
else:
    tickformat = "~s"
fig.update_yaxes(range=y_range, tickformat=tickformat)
fig.update_layout(showlegend=False)
fig.show("svg")

```

In [279...

```

alpha_results = select_results(ablation_results, tag="return")
alpha_box_figures = {}
y_range_dict = {
    "smacv1": (0.01, 22),
    "smacv2": (4, 18),
    "mamujoco": (-900, 4200),
}
for env_name, data in alpha_results.items():
    if env_name in SMACV1_ENV_NAMES:
        min_y, max_y = y_range_dict["smacv1"]
    elif env_name in SMACV2_ENV_NAMES:
        min_y, max_y = y_range_dict["smacv2"]
    else:
        min_y, max_y = y_range_dict["mamujoco"]
    alpha_box_figures[env_name] = create_box_figure(data, min_y, max_y, tag="return")

show_box(alpha_box_figures, SMACV1_ENV_NAMES, tag="returns", y_range=y_range_dict["smacv1"])
show_box(alpha_box_figures, SMACV2_ENV_NAMES, tag="returns", y_range=y_range_dict["smacv2"])
show_box(alpha_box_figures, MAMUJOCO_ENV_NAMES, tag="returns", y_range=y_range_dict["mamujoco"])

```

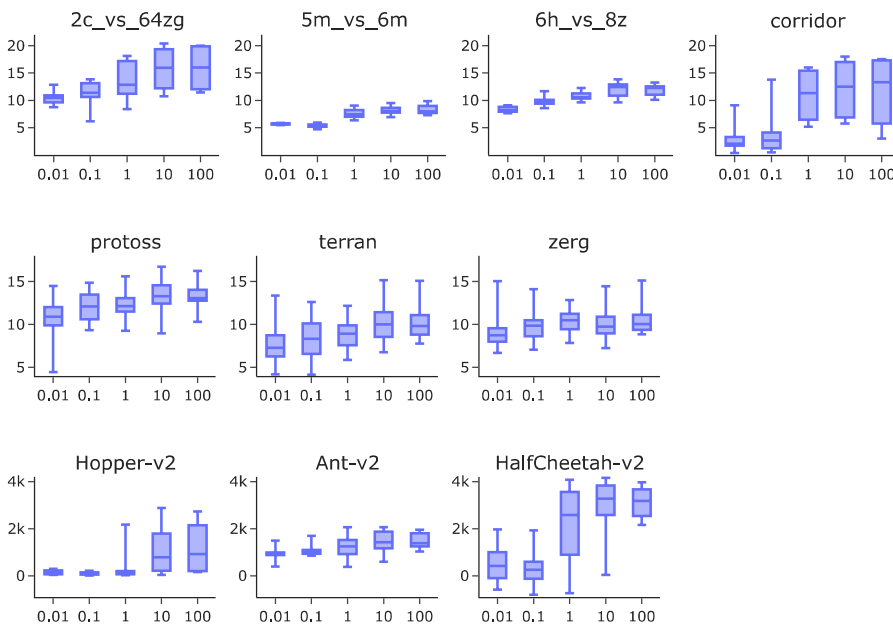

In [279...

```

alpha_results = select_results(ablation_results, tag="winrate")
alpha_box_figures = {}
for env_name, data in alpha_results.items():
    min_y, max_y = (1e-4, 0.599) if env_name in SMACV1_ENV_NAMES else (1e-4, 0.699)
    alpha_box_figures[env_name] = create_box_figure(data, min_y, max_y, tag="winrate")

show_box(alpha_box_figures, SMACV1_ENV_NAMES, tag="winrates", y_range=(1e-4, 0.599))
show_box(alpha_box_figures, SMACV2_ENV_NAMES, tag="winrates", y_range=(1e-4, 0.699))

```

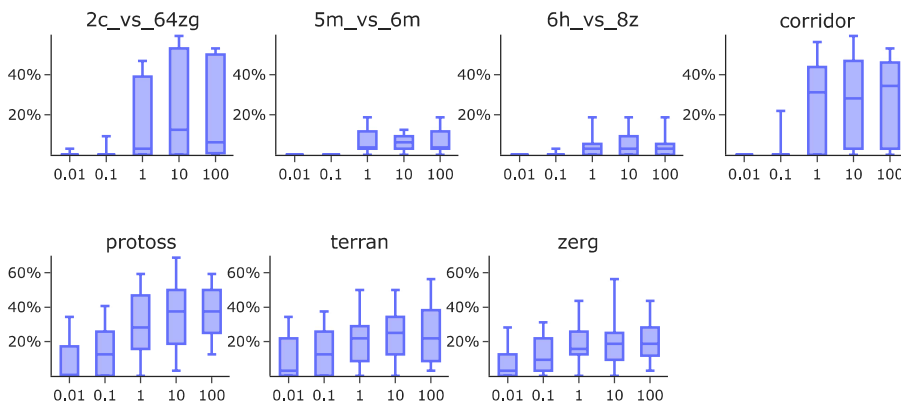

In [279...

```

def smooth(scalars, weight):
    last = 0
    smoothed = []
    for num_acc, next_val in enumerate(scalars):
        last = last * weight + (1 - weight) * next_val
        smoothed.append(last / (1 - math.pow(weight, num_acc+1)))
    return smoothed

```

In [279...

```

def create_scatters(data, y_range=None, tag="return", smooth_weight=0.5):
    fig = go.Figure()
    all_values = []
    for algo, items in data.items():

```

```

all_items = defaultdict(list)
for item in items:
    for key, value in item.items():
        if tag in value:
            all_items[key].append(value[tag])

if len(all_items) == 0:
    continue
if "2-layer" in algo:
    continue

steps = sorted(all_items.keys())
values = [np.mean(all_items[key]) for key in steps]
stds = [np.std(all_items[key]) for key in steps]

values = smooth(values, smooth_weight)

uppers = [value + std for value, std in zip(values, stds)]
lowers = [value - std for value, std in zip(values, stds)]

if tag == "winrate":
    uppers = [min(1.0, value) for value in uppers]
    lowers = [max(0.0, value) for value in lowers]
all_values += values

color = COLOR_MAPS.get(algo, colors[2])
fig.add_trace(go.Scatter(x=steps, y=values, mode="lines", name=algo, line_color=color, line_width=1.5))
fig.add_trace(go.Scatter(x=steps+steps[:-1], y=uppers+lowers[:-1], fill="toself", fillcolor=color, line_color=color, opacity=0.05, line_width=1))

fig.update_layout(template='simple_white', margin=dict(l=0, r=0, t=0, b=0, pad=0, autoexpand=True))
fig.update_layout(height=100, width=180)
fig.update_xaxes(range=[0, 100], dtick=50, minor=dict(ticklen=3, nticks=4))
if tag == "winrate":
    tickformat = ".0%"
else:
    tickformat = "~s"
fig.update_yaxes(range=y_range, tickformat=tickformat)
fig.update_layout(showlegend=False)
return fig

```

In [279...

```

plotly_figs = {}
y_range_dict = {
    "2c_vs_64zg": (9, 21),
    "5m_vs_6m": (3, 9.5),
    "6h_vs_8z": (8.1, 13.5),
    "corridor": (1, 19.5),
    "protoss": (4, 16.5),
    "terran": (1, 14.5),
    "zeng": (2, 14),
    "Hopper-v2": (-500, 3200),
    "Ant-v2": (-900, 2400),
    "HalfCheetah-v2": (-900, 4500),
}
for (env_name, mode), data in main_results.items():
    y_range = y_range_dict.get(env_name)
    plotly_figs[(env_name, mode)] = create_scatters(data, y_range=y_range, tag="return")

```

In [280...

```

def update_legend(fig, tag="returns"):
    trace_names = []
    for trace in fig.data:
        if trace.name is not None and trace.name not in trace_names:
            trace_names.append(trace.name)
            trace.update(showlegend=True)
        else:
            trace.update(showlegend=False)
    fig.update_layout(legend=dict(orientation="h", yanchor="bottom", y=1.05, xanchor="right", x=1))
    if tag == "winrates":
        fig.update_yaxes(range=[0, None], tickformat=".0%")
    else:
        fig.update_yaxes(tickformat="~s")

```

In [280...

```

fig = make_subplots(rows=4, cols=3, subplot_titles=[f"{env_name}_{mode}" for env_name in SMACV1_ENV_NAMES for mode in SMACV1_MODES])
for i, mode in enumerate(SMACV1_MODES):
    for j, env_name in enumerate(SMACV1_ENV_NAMES):
        plotly_fig = plotly_figs[(env_name, mode)]
        plotly_fig.write_image(f"graphs/{env_name}_{mode}_returns.pdf")
        fig.add_traces(plotly_fig.data, rows=j+1, cols=i+1)
fig.update_layout(height=640, width=800, title_text="SMACv1")
update_legend(fig, tag="returns")
fig.show("svg")

```

## SMACv1

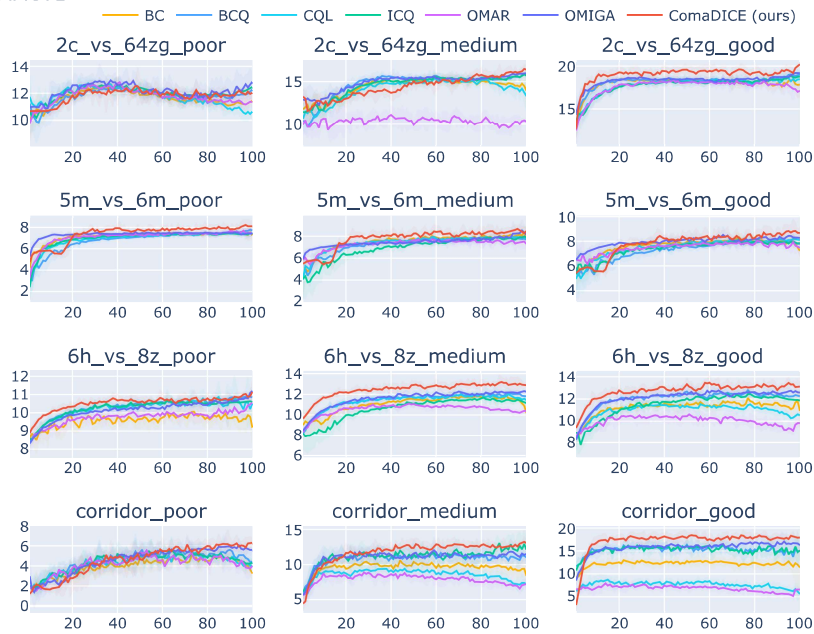

In [280..

```
fig = make_subplots(rows=3, cols=5, subplot_titles=[f"{env_name}_{mode}" for env_name in SMACV2_ENV_NAMES for mode in SMACV2_MODES])
for i, mode in enumerate(SMACV2_MODES):
    for j, env_name in enumerate(SMACV2_ENV_NAMES):
        plotly_fig = plotly_figs[(env_name, mode)]
        plotly_fig.write_image(f"graphs/{env_name}_{mode}_returns.pdf")
        fig.add_traces(plotly_fig.data, rows=j+1, cols=i+1)
fig.update_layout(height=640, width=1200, title_text="SMACv2")
update_legend(fig, tag="returns")
fig.show("svg")
```

## SMACv2

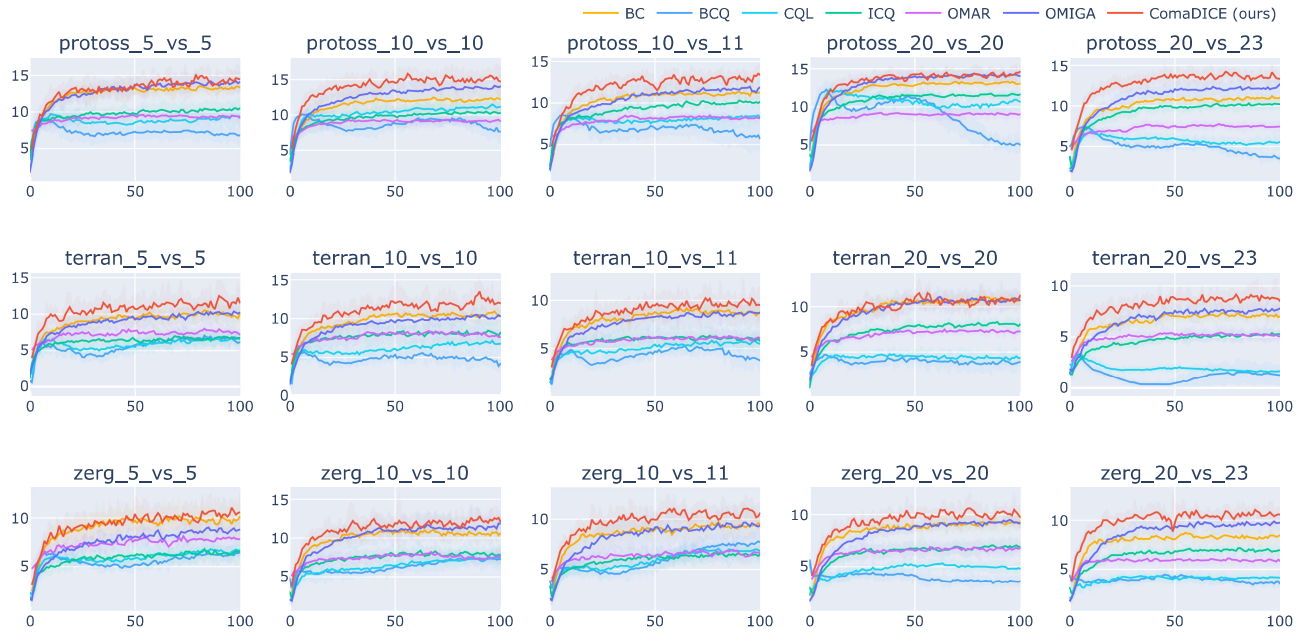

In [280..

```
fig = make_subplots(rows=3, cols=4, subplot_titles=[f"{env_name}_{mode}" for env_name in MAMUJOCO_ENV_NAMES for mode in MAMUJOCO_MODES])
for i, mode in enumerate(MAMUJOCO_MODES):
    for j, env_name in enumerate(MAMUJOCO_ENV_NAMES):
        plotly_fig = plotly_figs[(env_name, mode)]
        plotly_fig.write_image(f"graphs/{env_name}_{mode}_returns.pdf")
        fig.add_traces(plotly_fig.data, rows=j+1, cols=i+1)
fig.update_layout(height=640, width=1200, title_text="MaMujoco")
update_legend(fig, tag="returns")
fig.show("svg")
```



## MaMujoco

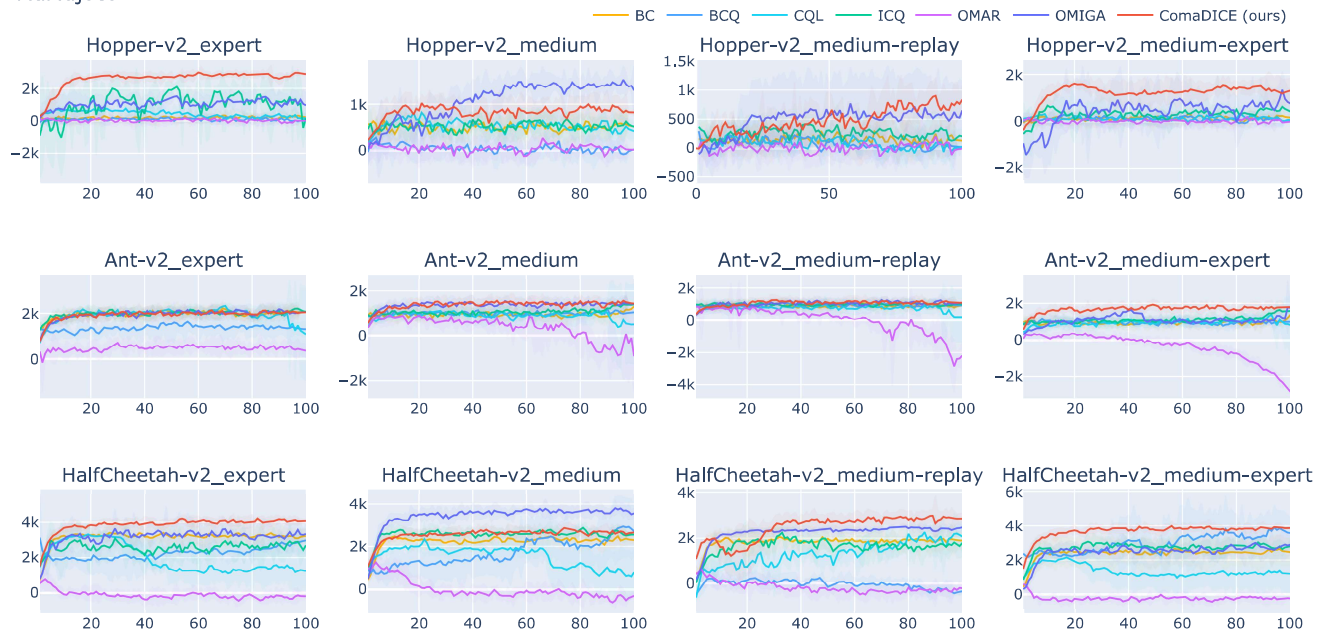

In [280..

```
plotly_figs = {}
y_range_dict = {
    "2c_vs_64zg": (1e-4, 0.599),
    "5m_vs_6m": (1e-4, 0.12),
    "6h_vs_8z": (1e-4, 0.16),
    "corridor": (1e-4, 0.599),
    "protoss": (1e-4, 0.599),
    "terrari": (1e-4, 0.599),
    "zerg": (1e-4, 0.599),
}
for (env_name, mode), data in main_results.items():
    if env_name in MAMUJOCO_ENV_NAMES:
        continue
    y_range = y_range_dict.get(env_name)
    plotly_figs[(env_name, mode)] = create_scatters(data, y_range, "winrate", 0.6)
```

In [280..

```
fig = make_subplots(rows=4, cols=3, subplot_titles=[f"{env_name}_{mode}" for env_name in SMACV1_ENV_NAMES for mode in SMACV1_MODES])
for i, mode in enumerate(SMACV1_MODES):
    for j, env_name in enumerate(SMACV1_ENV_NAMES):
        plotly_fig = plotly_figs[(env_name, mode)]
        plotly_fig.write_image(f"graphs/{env_name}_{mode}_winrates.pdf")
        fig.add_traces(plotly_fig.data, rows=j+1, cols=i+1)
fig.update_layout(height=640, width=800, title_text="SMACv1")
update_legend(fig, tag="winrates")
fig.show("svg")
```

## SMACv1

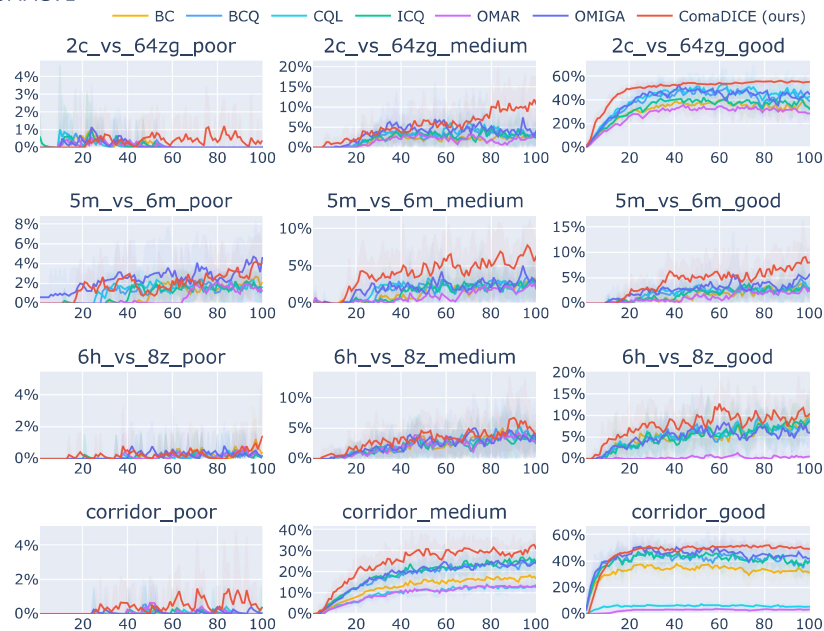

In [280..

```
fig = make_subplots(rows=3, cols=5, subplot_titles=[f"{env_name}_{mode}" for env_name in SMACV2_ENV_NAMES for mode in SMACV2_MODES])
for i, mode in enumerate(SMACV2_MODES):
    for j, env_name in enumerate(SMACV2_ENV_NAMES):
        plotly_fig = plotly_figs[(env_name, mode)]
        plotly_fig.write_image(f"graphs/{env_name}_{mode}_winrates.pdf")
        fig.add_traces(plotly_fig.data, rows=j+1, cols=i+1)
```

```
fig.update_layout(height=640, width=1200, title_text="SMACv2")
update_legend(fig, tag="winrates")
fig.show("svg")
```

## SMACv2

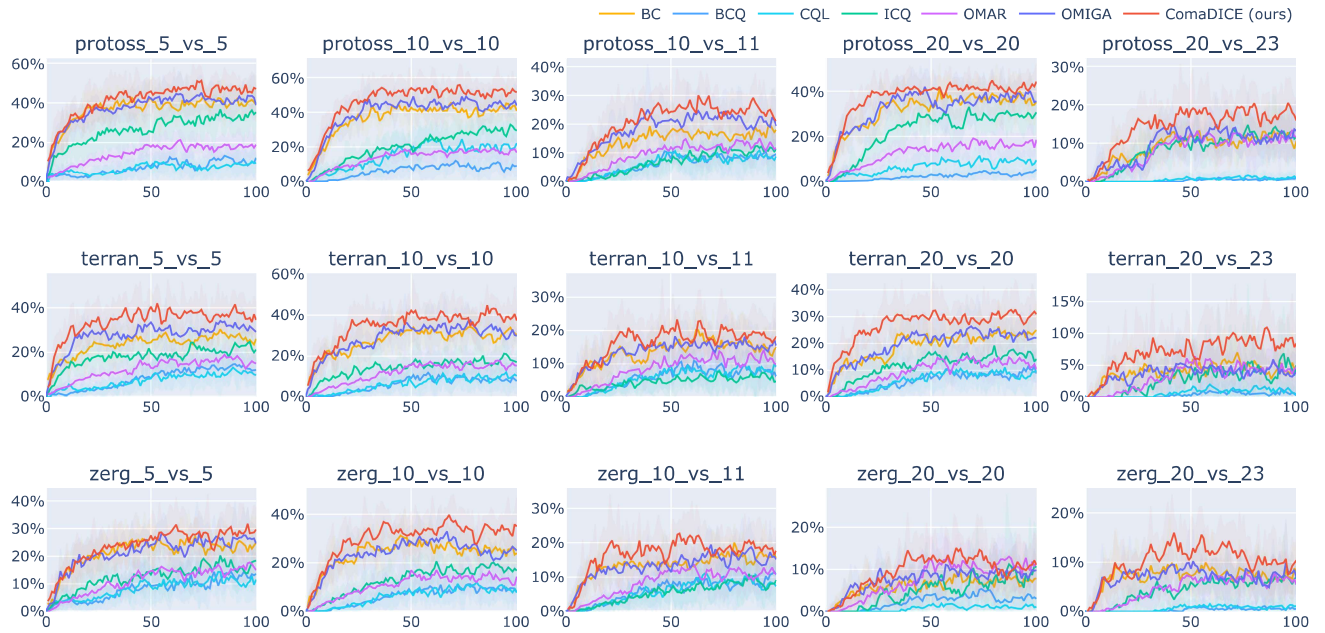

```
In [280... fig.update_layout(template='simple_white', margin=dict(l=4, r=4, t=4, b=4, pad=4, autoexpand=True))
fig.update_layout(height=300, width=1000, title_text=None)
fig.update_layout(legend=dict(orientation="h", yanchor="bottom", y=1.5, xanchor="right", x=1))
fig.write_image(f"graphs/legends.pdf")
```

```
In [280... def get_data_info(filename):
    data = np.load(f"offline_data/{filename}.npz", allow_pickle=True)
    states = data["states"]
    obs = data["obs"]
    actions = data["actions"]
    rewards = data["rewards"]
    dones = data["dones"]
    avails = data.get("avails")
    actives = data["actives"]

    is_last = np.zeros_like(dones)
    is_last[:, :-1] = dones[:, 1:]

    n_trajs, _, n_agents, ob_dim = obs.shape
    st_dim = states.shape[-1]
    ac_dim = avails.shape[-1] if avails is not None else actions.shape[-1]
    if avails is None:
        st_dim = st_dim * n_agents
    rewards = rewards.sum(1)
    avg_reward = np.mean(rewards)
    std_reward = np.std(rewards)
    n_trans = np.sum(actives)
    n_trajs = f"{n_trajs/1e3:.1f}K" if n_trajs < 1e6 else f"{n_trajs/1e3:.0f}K"
    n_trans = f"{n_trans/1e3:.1f}K" if n_trans < 1e6 else f"{n_trans/1e3:.0f}K"
    return {
        "n_trajs": n_trajs,
        "n_trans": n_trans,
        "n_agents": n_agents,
        "st_dim": st_dim,
        "ob_dim": ob_dim,
        "ac_dim": ac_dim,
        "reward": f"{avg_reward:.1f}±{std_reward:.1f}",
    }
```

```
In [280... data_info = {}
with Pool(4) as p:
    tasks = []
    for env_name in SMACV1_ENV_NAMES:
        for mode in SMACV1_MODES:
            tasks.append((env_name, mode, p.submit(get_data_info, f"{env_name}_{mode}")))
    for env_name in SMACV2_ENV_NAMES:
        for mode in SMACV2_MODES:
            tasks.append((env_name, mode, p.submit(get_data_info, f"{env_name}_{mode}_medium")))
    for env_name in MAMUJOCO_ENV_NAMES:
        for mode in MAMUJOCO_MODES:
            env_conf_dict = {
                "Hopper-v2": "3x1",
                "Ant-v2": "2x4",
                "HalfCheetah-v2": "6x1",
            }
            env_conf = env_conf_dict[env_name]
            tasks.append((env_name, mode, p.submit(get_data_info, f"{env_name}-{env_conf}-{mode}")))
    for env_name, mode, task in tqdm(tasks):
        data_info[(env_name, mode)] = task.result()
```

100%|██████████| 39/39 [00:25<00:00, 1.54it/s]

```
In [281... df = pd.DataFrame(data_info).T
df
```

|                |               | n_trajs | n_trans | n_agents | st_dim | ob_dim | ac_dim | reward        |
|----------------|---------------|---------|---------|----------|--------|--------|--------|---------------|
| 2c_vs_64zg     | poor          | 0.3K    | 21.7K   | 2        | 675    | 478    | 70     | 8.9±1.0       |
|                | medium        | 1.0K    | 75.9K   | 2        | 675    | 478    | 70     | 13.0±1.4      |
|                | good          | 1.0K    | 118.4K  | 2        | 675    | 478    | 70     | 19.9±1.3      |
| 5m_vs_6m       | poor          | 1.0K    | 113.7K  | 5        | 156    | 124    | 12     | 8.5±1.2       |
|                | medium        | 1.0K    | 138.6K  | 5        | 156    | 124    | 12     | 11.0±0.6      |
|                | good          | 1.0K    | 138.7K  | 5        | 156    | 124    | 12     | 20.0±0.0      |
| 6h_vs_8z       | poor          | 1.0K    | 145.5K  | 6        | 213    | 172    | 14     | 9.1±0.8       |
|                | medium        | 1.0K    | 177.1K  | 6        | 213    | 172    | 14     | 12.0±1.3      |
|                | good          | 1.0K    | 228.2K  | 6        | 213    | 172    | 14     | 17.8±2.1      |
| corridor       | poor          | 1.0K    | 307.6K  | 6        | 435    | 346    | 30     | 4.9±1.7       |
|                | medium        | 1.0K    | 756.1K  | 6        | 435    | 346    | 30     | 13.1±1.3      |
|                | good          | 1.0K    | 601.0K  | 6        | 435    | 346    | 30     | 19.9±1.0      |
| protoss        | 5_vs_5        | 1.0K    | 60.8K   | 5        | 130    | 92     | 11     | 16.8±6.3      |
|                | 10_vs_10      | 1.0K    | 68.3K   | 10       | 310    | 182    | 16     | 15.7±5.2      |
|                | 10_vs_11      | 1.0K    | 62.9K   | 10       | 327    | 191    | 17     | 15.3±5.7      |
|                | 20_vs_20      | 1.0K    | 76.7K   | 20       | 820    | 362    | 26     | 16.2±4.7      |
|                | 20_vs_23      | 1.0K    | 65.0K   | 20       | 901    | 389    | 29     | 14.0±4.5      |
| terran         | 5_vs_5        | 1.0K    | 47.6K   | 5        | 120    | 82     | 11     | 15.2±7.2      |
|                | 10_vs_10      | 1.0K    | 56.4K   | 10       | 290    | 162    | 16     | 14.7±6.2      |
|                | 10_vs_11      | 1.0K    | 52.5K   | 10       | 306    | 170    | 17     | 12.1±5.7      |
|                | 20_vs_20      | 1.0K    | 63.0K   | 20       | 780    | 322    | 26     | 14.0±6.0      |
|                | 20_vs_23      | 1.0K    | 51.3K   | 20       | 858    | 346    | 29     | 11.7±5.7      |
| zerg           | 5_vs_5        | 1.0K    | 27.5K   | 5        | 120    | 82     | 11     | 10.4±5.0      |
|                | 10_vs_10      | 1.0K    | 31.9K   | 10       | 290    | 162    | 16     | 14.7±6.0      |
|                | 10_vs_11      | 1.0K    | 30.9K   | 10       | 306    | 170    | 17     | 12.0±5.1      |
|                | 20_vs_20      | 1.0K    | 35.4K   | 20       | 780    | 322    | 26     | 12.3±4.2      |
|                | 20_vs_23      | 1.0K    | 32.8K   | 20       | 858    | 346    | 29     | 10.8±4.0      |
| Hopper-v2      | expert        | 1.5K    | 998.9K  | 3        | 42     | 14     | 1      | 2452.0±1097.9 |
|                | medium        | 4.0K    | 915.4K  | 3        | 42     | 14     | 1      | 723.6±211.7   |
|                | medium-replay | 4.2K    | 1311K   | 3        | 42     | 14     | 1      | 746.4±671.9   |
|                | medium-expert | 5.5K    | 1914K   | 3        | 42     | 14     | 1      | 1190.6±973.4  |
| Ant-v2         | expert        | 1.0K    | 1000K   | 2        | 226    | 113    | 4      | 2055.1±22.1   |
|                | medium        | 1.0K    | 1000K   | 2        | 226    | 113    | 4      | 1418.7±37.0   |
|                | medium-replay | 1.8K    | 1750K   | 2        | 226    | 113    | 4      | 1029.5±141.3  |
|                | medium-expert | 2.0K    | 2000K   | 2        | 226    | 113    | 4      | 1736.9±319.6  |
| HalfCheetah-v2 | expert        | 1.0K    | 1000K   | 6        | 138    | 23     | 1      | 2785.1±1053.1 |
|                | medium        | 1.0K    | 1000K   | 6        | 138    | 23     | 1      | 1425.7±520.1  |
|                | medium-replay | 1.0K    | 1000K   | 6        | 138    | 23     | 1      | 655.8±590.4   |
|                | medium-expert | 2.0K    | 2000K   | 6        | 138    | 23     | 1      | 2105.4±1073.2 |
